# Supplementary material for: Development of a food frequency questionnaire for the estimation of dietary (poly)phenol intake
Source: Royal Society of Chemistry journal article supplement (doi:10.1039/d4fo03546a), 2024-01-01
Supplement: d4fo03546a1.xlsx [file d4fo03546a1.xlsx]

## Sheet: Supplemental Table 1
	Supplemental Table 1. Comparison of the food items in the EPIC-Norfolk FFQs and KCL (Poly)phenol FFQs
	Food groups	EPIC-Norfolk FFQ			KCL (Poly)phenol FFQ
		Food item	Food code		Food item	Food code
	Bread	White bread, average	11099		White bread, average	11099
		Wholemeal bread, average	11113		Wholemeal bread, average	11113
		Oat and wheatbran	75		Bagel, plain, average	b1000
					Bagel, wholemeal, average	b1010
					Baguette, white, retail, 1/2 baguette	b1200
					Bread, seeded, medium slice	b1300
					Bread, rye, regular slice	b1310
					Brioche roll, retail, average	b1400
					Brioche roll, chocolate chip, retail, average	b1410
					Bread, ciabatta, average	b1500
					Warbutons, crumpet, average	b1600
					Plain folded flatbread, average	b1700
					Hot cross buns, average	b1800
					Bread, naan, retail	b1900
					Scotch pancakes, retail	b2000
					Panini, white, average	b2100
					Bread, pitta, white, average	b2200
					Bread, pitta, wholemeal, average	b2210
					Tortilla, wheat flour, soft, average	b2300
					Tortilla, wholemeal flour, soft, average	b2310
					Waffle, retail, average	b2400
	Cereals	Readybrek	11145		Readybrek	11145
		Porridge, made with water recipe	11143		Porridge, made with water recipe	11143
		Brown rice, boiled	11036		Brown rice, boiled	11036
		White rice, easycook, boiled	11043		White rice, easycook, boiled	11043
					Breakfast cereal, bran flakes, fortified	BC100
					Breakfast cereal, cornflakes, fortified	BC200
					Muesli, swiss style, unfortified	BC300
					Breakfast cereal, oat flakes	BC400
	Potatoes	Potatoes, old, boiled in salted water	13013		Potatoes, old, boiled in salted water	13013
		Chips, retail, fried in vegetable oil	13022		Chips, retail, fried in vegetable oil	13022
		Salad, potato, with mayonnaise, recipe	15296		Salad, potato, with mayonnaise, recipe	15296
		Salad, potato, with mayonnaise, retail	15297		Salad, potato, with mayonnaise, retail	15297
		Salad, potato, with reduced calorie dressing, retail	15298		Salad, potato, with reduced calorie dressing, retail	15298
		Old potatoes, roast in corn oil	x3016		Old potatoes, roast in corn oil	x3016
		Chips, straight cut, fried in corn oil	x3025		Chips, straight cut, fried in corn oil	x3025
	Sweet potatoes				Sweet potatoes, boiled in salted water	TO100
					Sweet potatoes, chips, straight cut, fried in corn oil	TO200
					Sweet potatoes, chips, retail, fried in vegetable oil	TO210
					Salad, sweet potato, with mayonnaise, recipe	TO300
					Salad, sweet potato, with mayonnaise, retail	TO310
					Salad, sweet potato, with reduced calorie dressing, retail	TO320
					Sweet potatoes, roast in corn oil	TO400
	Pasta and others	Spaghetti, white, boiled	11062		Spaghetti, white, boiled	11062
		Spaghetti, wholemeal, boiled	11064		Spaghetti, wholemeal, boiled	11064
		Pizza, cheese and tomato, recipe	11349		Pizza, cheese and tomato, recipe	11349
		Pizza, cheese and tomato, retail	11350		Pizza, cheese and tomato, retail	11350
		Lasagne, frozen, cooked, retail	19238		Lasagne, frozen, cooked, retail	19238
		Moussaka, recipe	19247		Moussaka, recipe	19247
					Pizza, pesto, recipe	p1100
					Pizza, pesto, retail	p1110
					Pizza, vegetarian, recipe	p1200
					Pizza, vegetarian, retail	p1210
	Dairy products, dairy alternatives and fats	Single, fresh cream, pasteurised	12113		Single, fresh cream, pasteurised	12113
		Double, fresh cream, pasteurised	12116		Double, fresh cream, pasteurised	12116
		Crème caramel,retail	12220		Crème caramel,retail	12220
		Mousse, frozen, retail	12247		Mousse, frozen, retail	12247
		Brie	12131		Brie	12131
		Cheddar, average	12134		Cheddar, average	12134
		Edam	12154		Edam	12154
		Cottage cheese, plain	12147		Cottage cheese, plain	12147
		Eggs, chicken, whole, raw	12801		Eggs, chicken, whole, raw	12801
		Quiche, cheese and egg, recipe	12283		Quiche, cheese and egg, recipe	12283
		Quiche lorraine, recipe	12285		Quiche lorraine, recipe	12285
		Salad cream, reduced calorie	17327		Salad cream, reduced calorie	17327
		Mayonnaise, retail	17316		Mayonnaise, retail	17316
		Salad cream, retail	17326		Salad cream, retail	17326
		French dressing, retail	17302		French dressing, retail	17302
		Mayonnaise, retail, low fat	17318		Mayonnaise, retail, low fat	17318
		Butter	17013		Butter	17013
		Margarine, hard, animal and vegetable fats	17018		Margarine, hard, animal and vegetable fats	17018
		Margarine (70% fat), polyunsaturated	17023		Margarine (70% fat), polyunsaturated	17023
					Margarine, olive oil based, polyunsaturated	sm170
		Margarine, soft, not polyunsaturated	17020		Margarine, soft, not polyunsaturated	sm180
		Fat spread (40% fat), not polyunsaturated	17026		Fat spread (40% fat), not polyunsaturated	17026
		Fat spread (20-25% fat), not polyunsaturated	17028		Fat spread (20-25% fat), not polyunsaturated	17028
		Low fat yogurt, fruit	12190		Low fat yoghurt, blueberry	LY120
					Low fat yoghurt, cherry	LY121
					Low fat yoghurt, chocolate	LY122
					Low fat yoghurt, fromage frais	LY123
					Low fat yoghurt, mango	LY124
					Low fat yoghurt, mixed berries or fruits	LY125
					Low fat yoghurt, peach	LY126
					Low fat yoghurt, raspberry	LY127
					Low fat yoghurt, strawberry	LY128
					Yoghurt drinks, blueberry, e.g. Benecol, Actimel	YD130
					Yoghurt drinks, peach, e.g. Benecol, Actimel	YD131
					Yoghurt drinks, raspberry, e.g. Benecol, Actimel	YD132
					Yoghurt drinks, strawberry, e.g. Benecol, Actimel	YD133
					Full fat or Greek yoghurt, blueberry	FY140
					Full fat or Greek yoghurt, cherry	FY141
					Full fat or Greek yoghurt, chocolate	FY142
					Full fat or Greek yoghurt, mixed berries or fruits	FY143
					Full fat or Greek yoghurt, passionfruit	FY144
					Full fat or Greek yoghurt, peach	FY145
					Full fat or Greek yoghurt, raspberry	FY146
					Full fat or Greek yoghurt, strawberry	FY147
					Soy based, low fat yoghurt, blueberry	SY150
					Soy based, low fat yoghurt, cherry	SY151
					Soy based, low fat yoghurt, plain/vanilla	SY152
					Soy based, low fat yoghurt, strawberry	SY153
					Soy based, greek style, mango	SY154
					Soy based, greek style, plain	SY155
					Soy based, greek style, strawberry	SY156
					Coconut based, yoghurt, blueberry	CY160
					Coconut based, yoghurt, mango and passionfruit	CY161
					Almond milk	AM100
					Cashew milk	AM101
					Hazelnut milk	AM102
					Oat milk	AM103
					Soy milk	AM104
	Fruits and dried fruits	Apples, eating, average, raw, flesh and skin weighed with core	14013		Green apples, eating, raw, flesh only, weighed with core	F1000
					Green apples, eating, raw, flesh and skin, weighed with core	F1010
					Red apples, eating, raw, flesh only, weighed with core	F1200
					Red apples, eating, raw, flesh and skin, weighed with core	F1210
		Apricots, raw, flesh and skin	14025		Apricots, raw, flesh and skin	14025
		Apricots, dried, no stones	14031		Apricots, dried, no stones	14031
		Bananas, flesh only	14045		Bananas, flesh only	14045
		Fruit cocktail, canned in juice	14096		Fruit cocktail, canned in juice	14096
		Fruit cocktail, canned in syrup	14097		Fruit cocktail, canned in syrup	14097
		Grapefruit, raw	14105		Grapefruit, raw	14105
		Kiwi fruit, weighed with skin	14124		Kiwi fruit, weighed with skin	14124
		Melon, average, flesh only	14153		Melon, average, flesh only	14153
		Oranges, weighed with peel and pips	14176		Oranges, weighed with peel and pips	14176
		Peaches, raw, flesh and skin	14183		Peaches, raw, flesh and skin	14183
		Pears, average, raw, weighed with core	14191		Pears, average, raw, weighed with core	14191
		Pears, average, raw, peeled, weighed with skin and core	14193		Pears, average, raw, peeled, weighed with skin and core	14193
		Plums, average, raw, flesh and skin	14213		Plums, average, raw, flesh and skin	14213
		Prunes, no stones	14231		Prunes, no stones	14231
		Raisins	14242		Raisins	14242
		Raspberries, raw, whole fruit	14244		Raspberries, raw, whole fruit	14244
		Strawberries, raw, flesh and pips	14260		Strawberries, raw, flesh and pips	14260
					Blackberries, raw	F1300
					Blackcurrants, raw	F1400
					Blueberries, raw	F1500
					Cherries, flesh and skin, raw, weighed with stones	F1600
					Figs, whole green, fruit, raw	F1700
					Grapes, black, average	F1800
					Grapes, green, average	F1810
					Lemons, whole, without pips, average	F1900
					Limes, flesh only, fruit	F2000
					Mandarins, weighed with peel and pips	F2100
					Mangoes, ripe, raw, flesh only, slice	F2200
					Nectarines, flesh and skin, small	F2300
					Pineapple, raw, flesh only, slice	F2400
					Pomegranate, seeds, flesh and pips, medium fruit	F2500
					Quinces, flesh only, average	F2600
					Redcurrant, raw	F2700
					Oranges, weighed with peel and pips	F2800
					Melon, watermelon, flesh only, average slice	F2900
					Dates, dried, flesh and skin	DF100
					Figs, dried, average portion	DF110
	Vegetables	Broccoli, boiled in salted water	13171		Broccoli, boiled in salted water	13171
		Brussels sprouts, boiled in salted water	13178		Brussels sprouts, boiled in salted water	13178
		Beansprouts, mung, raw	13052		Beansprouts, mung, raw	13052
		Broad beans, boiled in salted water	13065		Broad beans, boiled in salted water	13065
		Green beans/french beans, boiled in salted water	13082		Green beans/french beans, boiled in salted water	13082
		Runner beans, boiled in salted water	13113		Runner beans, boiled in salted water	13113
		Peas, frozen, boiled in salted water	13133		Peas, frozen, boiled in salted water	13133
		Peas, canned, reheated, drained	13135		Peas, canned, reheated, drained	13135
		Beetroot, pickled, drained	13166		Beetroot, pickled, drained	13166
		Cabbage, savoy, boiled in salted water	13193		Cabbage, savoy, boiled in salted water	13193
		Carrots, old, boiled in salted water	13201		Carrots, old, boiled in salted water	13201
		Carrots, young, boiled in salted water	13204		Carrots, young, boiled in salted water	13204
		Cauliflower, boiled in salted water	13216		Cauliflower, boiled in salted water	13216
		Celery, raw	13221		Celery, raw	13221
		Courgettes, boiled in unsalted water	13231		Courgettes, boiled in unsalted water	13231
		Cucumber, raw	13233		Cucumber, raw	13233
		Leeks, boiled in salted water	13264		Leeks, boiled in salted water	13264
		Lettuce, green, average, raw	13266		Lettuce, green, average, raw	13266
					Lettuce, red, average, raw	13267
		Marrow, boiled in salted water	13275		Marrow, boiled in salted water	13275
		Pumpkin, flesh only, boiled in unsalted water	13290		Pumpkin, flesh only, boiled in unsalted water	13290
		Onions, red, raw	13304		Onions, red, raw	13304
					Onions, white, raw	13305
					Onions, yellow, raw	13306
		Parsnip, boiled in salted water	13313		Parsnip, boiled in salted water	13313
		Peppers, green, raw	13318		Peppers, green, raw	13318
		Peppers, red, raw	13320		Peppers, red, raw	13320
					Peppers, yellow, raw	13322
		Spinach, boiled in salt water	13344		Spinach, boiled in salt water	13344
		Spring greens, boiled in salted water	13349		Spring greens, boiled in salted water	13349
		Swede, boiled in salted water	13360		Swede, boiled in salted water	13360
		Sweetcorn, kernels, boiled in salted water	13369		Sweetcorn, kernels, boiled in salted water	13369
		Tomatoes, raw	13384		Tomatoes, raw	13384
					Tomatoes, cherry, raw	13390
					Tomatoes, sun dried	13395
		Watercress	13396		Watercress	13396
		Avocado	14037		Avocado	14037
		Coleslaw, with mayonnaise, retail	15077		Coleslaw, with mayonnaise, retail	15077
		Coleslaw, with reduced calorie dressing, retail	15078		Coleslaw, with reduced calorie dressing, retail	15078
		Coleslaw with vinaigrette, retail	15079		Coleslaw with vinaigrette, retail	15079
		Mushrooms, common, boiled in salted water	13285		Mushroom, chestnut, boiled in salted water	M1000
					Mushroom, portobello, boiled in salted water	M1100
					Mushroom, white, boiled in salted water	M1200
					Quorn products	M1300
					Cabbage, green, boiled in salted water	V1300
					Cabbage, purple, boiled in salted water	V1310
					Cabbage, red, boiled in salted water	V1320
					Curly kale, boiled in unsalted water, one cup	V1400
					Cabbage, pointed, sweetheart, raw, small portion	V1500
					Sauerkraut, one tablespoon	V1600
					Cabbage, chinese, raw, small portion	V1700
					Pak choi, steamed, one cup	V1800
					Peppers, chilli, green, raw, average	V1900
					Peppers, chilli, red, raw, average	V1910
					Peppers, chilli, yellow, raw, average	V1920
					Aubergine, boiled in salted water	V2000
					Olives, black, in brine, drained, flesh and skin, 1/4 cup	V2100
					Olives, green, in brine, drained, flesh and skin, 1/4 cup	V2110
					Chicory, green, boiled in unsalted water	V2200
					Chicory, red, boiled in unsalted water	V2210
					Rocket leaves, raw, one cup	V2300
					Chard, swiss, red, boiled in unsalted water, one cup	V2400
					Chard, swiss, white, boiled in unsalted water, one cup	V2410
					Shallots, raw, one tablespoon	V2500
					Peas, sugar-snap, boiled in unsalted water	V2600
					Celeriac, boiled in salted water	V2700
					Radish, red, raw, flesh and skin	V2800
					Turnip, boiled in salted water	V2900
					Artichoke, globe, base of leaves and heart, boiled in unsalted water	V3000
					Asparagus, boiled in unsalted water	V3100
					Fennel, florence, raw	V3200
					Chard, swiss, red, boiled in unsalted water, one cup	V3300
					Chard, swiss, white, boiled in unsalted water, one cup	V3310
	Soy and soy products, and seeds	Soya mince, granules	15314		Soya mince, granules	15314
		Tofu, soya bean, steamed	13119		Tofu, soya bean, steamed	13119
		Vegeburger, retail, fried in vegetable oil	15330		Miso, one tablespoon	SSP10
					Tempeh	SSP20
					Edamame beans, boiled without salt	SSP30
		Baked beans, canned in tomato sauce	13043		Baked beans, canned in tomato sauce	13043
		Baked beans, canned in tomato sauce, reduced sugar	13045		Baked beans, canned in tomato sauce, reduced sugar	13045
		Baked beans, canned in tomato sauce, reduced sugar, reduced salt	13046		Baked beans, canned in tomato sauce, reduced sugar, reduced salt	13046
		Hazelnuts	14821		Hazelnuts	14821
		Peanuts, roasted and salted	14834		Peanuts, roasted and salted	14834
					Almonds, with skin	N1000
					Brazil nuts, kernel only	N1500
					Cashew nuts, kernel only, roasted and salted	N2000
					Chestnuts, kernel only, raw	N2500
					Macadamia nuts, unsalted	N3000
					Pecan nuts, kernel only	N3500
					Pine nuts, kernel only	N4000
					Pistachio nuts, roasted, unsalted, kernels only	N4500
					Walnuts, kernel only	N5000
					Flaxseed, milled or whole	OS100
					Sesame seeds	OS200
					Sunflower seeds	OS300
					Black beans, canned, drained	PB100
					Red kidney beans, canned in water, reheated, drained	PB200
					Cannellini beans, canned	PB300
					Lentils, brown, dried, whole, boiled in unsalted water	PL100
					Lentils, green, dried, whole, boiled in unsalted water	PL200
					Lentils, red, dried, whole, boiled in unsalted water	PL300
					Chickpeas, canned, reheated, drained	PP100
					Black-eyed beans, canned, reheated, drained	PP200
					Split peas, yellow, dried, boiled in unsalted water	PP300
	Fruit juice	Apple juice, unsweetened	14271		Apple, juice from concentrate	FJ100
					Apple, pure juice	FJ110
		Orange juice, unsweetened	14283		Blood orange, juice from concentrate	FJ200
					Blood orange, pure juice	FJ210
					Grapefruit, juice from concentrate	FJ300
					Grapefruit, pure juice	FJ310
					Lemon, juice from concentrate	FJ400
					Lemon, pure juice	FJ410
					Orange, juice from concentrate	FJ500
					Orange, pure juice	FJ510
					Pomegranate, juice from concentrate	FJ600
					Pomegranate, pure juice	FJ610
					Kiwi, juice from concentrate	FJ700
					Kiwi, pure juice	FJ710
	Non-alcoholic beverages	Drinking chocolate, powder, retail	1064		Drinking chocolate, powder, retail	1064
		Coffeemate	12027		Coffeemate	12027
		Horlicks powder	12097		Horlicks powder	12097
		Ovaltine powder	12108		Ovaltine powder	12108
		Coffee, infusion, average	17152		Coffee, infusion, average	17152
		Coca-cola	17175		Coca-cola	17175
		Lemonade, bottled	17179		Lemonade, bottled	17179
		Fruit drink/squash, concentrated	17189		Fruit drink/squash, concentrated	17189
		Carbonated beverages - low calorie	a7001		Carbonated beverages - low calorie	a7001
		Coffee, infusion, average	17152		Coffee, decaffeinated, espresso based	C1700
					Coffee, decaffeinated, filtered	C1710
					Coffee, decaffeinated, instant or ground	C1720
					Coffee, espresso based	C1730
					Coffee, filtered	C1740
					Chamomile tea	HI100
					Common sage tea	HI101
					Common thyme tea	HI102
					Coriander tea	HI103
					Fennel tea	HI104
					Lemongrass tea	HI105
					Mint tea (e.g. peppermint, spearmint)	HI106
					Rosemary tea	HI107
					Sweet basil tea	HI108
					Sweet bay tea	HI109
		Tea, black, infusion, average	17165		Black tea, assam	T1010
					Black tea, english breakfast tea	T1020
					Black tea, earl grey tea	T1030
					Green tea	T1100
	Alcoholic beverages	Vermouth, sweet	17240		Vermouth, sweet	17240
		Spirits, 40% volume	17247		Spirits, 40% volume	17247
		Cider, dry	17222		Cider, dry	17222
		Lager	17211		Ale, beer	AL100
					Dark, beer	AL110
					Regular, beer	AL120
					Champagne	AL200
					Red wine	AL210
		Rose wine, medium	17229		Wine, rose, medium	AL220
					Wine, white, medium	AL230
	Seasonings	Garlic, raw	13244		Garlic, raw	13244
					Basil, dried, ground	S1000
					Basil, fresh	S1100
					Capers	S1200
					Caraway seeds	S1300
					Cardamom, ground	S1400
					Cinnamon, ground	S1500
					Cloves, dried	S1600
					Common sage, dried, ground	S1700
					Common sage, fresh	S1710
					Common thyme, dried	S1800
					Common thyme, fresh	S1810
					Coriander, dried	S1900
					Coriander, fresh, raw	S1910
					Cumin seeds, whole or ground	S2000
					Cumin seeds, whole or ground	S2010
					Curry powder	S2100
					Dill, dried	S2200
					Dill, fresh	S2210
					Fenugreek seeds	S2300
					Ginger, ground	S2400
					Ginger, fresh	S2410
					Lemongrass, raw	S2500
					Marjoram, dried	S2600
					Mint, dried	S2700
					Mint, fresh	S2710
					Nutmeg, ground	S2800
					Oregano, dried, ground	S2900
					Oregano, fresh	S2910
					Parsley, dried	S3000
					Parsley, fresh	S3010
					Pepper spice, black	S3100
					Pepper spice, white	S3110
					Rosemary, dried	S3200
					Rosemary, fresh	S3210
					Saffron	S3300
					Star anise	S3400
					Tarragon, fresh	S3500
					Turmeric, ground	S3600
	Oils and butter	Peanut butter, smooth	14829		Peanut butter, smooth	14829
		Rapseed oil	17041		Rapeseed oil	O1200
		Olive oil	17038		Olive oil, extra virgin	O1100
					Olive oil, refined	O1110
					Olive oil, virgin	O1120
					Corn oil	O1000
					Almond butter	O1300
	Sweet and snacks	Cream crackers, retail	11167		Cream crackers, retail	11167
		Mars bar	17094		Mars bar	17094
		Twix	17100		Twix	17100
					Chocolate, dark	C1000
					Chocolate, fancy and filled	C1010
					Kinder bueno	C1100
					Crunchie	C1200
					Chocolate, mousse	C1300
	Savoury snacks	Crispbread, rye	11168		Crispbread, rye	11168
		Potato crisps	17133		Potato crisps	17133
					Crispbread, buckwheat	SS100
					Crispbread, seeded	SS110
					Oatcake	SS200
	Sweet biscuit	Digestive biscuits, chocolate	11169		Digestive biscuits, chocolate	11169
		Semi-sweet biscuits, retail	11183		Semi-sweet biscuits, retail	11183
					Biscuits, short, sweet	SB100
	Cookies				Biscuits, cookies, chocolate chip	CB100
					Biscuits, cookies, dark chocolate	CB101
					Biscuits, cookies, hazelnut	CB102
					Biscuits, cookies, oats	CB103
					Biscuits, cookies, oats, apple and cinnamon	CB104
					Biscuits, cookies, oats, raisin	CB105
					Biscuits, cookies, peanut	CB106
					Biscuits, cookies, peanut butter	CB107
					Biscuits, cookies, triple chocolate	CB108
					Biscuits, cookies, white chocolate	CB109
	Cakes	Fruit cake, plain, retail	11200		Fruit cake, plain, retail	11200
		Fruit cake, rich, fat removed	x1201
		Sponge cake, with fat, recipe	x1211		Sponge cake, with fat, recipe	x1211
					Sponge cake, jam filled, retail	CC100
					Carrot cake, iced, retail	CC102
					Cake, chocolate, with filling and icing, retail	CC103
					Cake, dark chocolate, with filling and icing, retail	CC104
					Walnut cake, retail	CC105
	Pies or crumble	Flapjacks, recipe	x1171		Flapjacks, recipe	x1171
		Crumble, fruit, fat removed	x1294		Crumble, apple, fruit, recipe	FC100
					Crumble, blueberry, fruit, recipe	FC200
					Crumble, cherry, fruit, recipe	FC300
					Crumble, mixed berries, fruit, recipe	FC400
					Crumble, raspberry, fruit, recipe	FC500
					Crumble, rhubarb, fruit, recipe	FC600
					Crumble, strawberry, fruit, recipe	FC700
		Fruit pie, individual	11310		Fruit pie, apple, pastry top and bottom, recipe	FP100
		Fruit pie, pastry top and bottom, fat removed	x1309		Fruit pie, blueberry, pastry top and bottom, recipe	FP200
					Fruit pie, cherry, pastry top and bottom, recipe	FP300
					Fruit pie, mixed berries, pastry top and bottom, recipe	FP400
					Fruit pie, raspberry, pastry top and bottom, recipe	FP500
					Fruit pie, rhubarb, pastry top and bottom, recipe	FP600
					Fruit pie, strawberry, pastry top and bottom, recipe	FP700
	Savoury Puddings				Pudding, steak and kidney	SP100
					Pudding, yorkshire	SP200
	Sweet puddings				Pudding, bread and butter, retail	SW100
		Sponge pudding, fat removed	x1325		Pudding, sponge based, with fruit jams, retail	SW200
					Pudding, sponge based, with syrups, retail	SW300
					Spotted dick, retail	SW400
					Sticky toffee pudding, retail	SW500
	Pastries	Croissants, fat removed	x1120		Croissant, sweet filling, almond, retail	P1111
					Crossaint, butter, retail	P1112
					Croissant, sweet filling, chocolate, retail	P1113
					Cinnamon swirl, retail	P1000
	Desserts and others	Rice pudding, canned	12248		Rice pudding, canned	12248
		Sugar, white	17063		Sugar, white	17063
		Boiled sweets	17101		Boiled sweets	17101
		Peppermints	17117		Peppermints	17117
		Toffees, mixed	17120		Toffees, mixed	17120
		Doughnuts, jam, retail	11242		Doughnuts, jam, retail	11242
					Doughnuts, chocolate, retail	DO100
					Doughnuts, iced or sugar ring, retail	DO110
		Trifle, frozen	12250		Trifle, frozen, chocolate, retail	DO120
					Trifle, frozen, mixed berries, retail	DO121
					Trifle, frozen, raspberry, retail	DO122
					Trifle, frozen, strawberry, retail	DO123
	Ice cream	Ice cream, dairy, vanilla	12204		Ice cream or gelato, chocolate, retail	IC100
		Ice cream, non-dairy, vanilla	12206		Ice cream or gelato, dark chocolate, retail	IC110
					Ice cream or gelato, hazelnut, retail	IC120
					Sorbet, blackcurrant, retail	IC200
					Sorbet, lemon, retail	IC210
					Sorbet, mango, retail	IC220
					Sorbet, raspberry, retail	IC230
	Jams, marmalade and honey				Honey	J1000
		Jam, fruit with edible seeds	17073		Jam, apricot, retail	J1001
					Jam, blackcurrant, retail	J1002
					Jam, blueberry, retail	J1003
					Jam, cherry, retail	J1004
					Jam, fig, retail	J1005
					Jam, orange, retail	J1006
					Jam, plum, retail	J1007
					Jam, raspberry, retail	J1008
					Jam, rhubarb, retail	J1009
					Jam, strawberry, retail	J1010
					Jam, sweet cherry, retail	J1011
					Marmalade, orange, retail	J1100
					Sauce, cranberry, retail	J1200
	Spreads, sauces and gravies	Tomato ketchup, retail	17338		Tomato ketchup, retail	17338
		Apple chutney, recipe	17341		Apple chutney, recipe	17341
		Pickle sweet, retail	17352		Pickle sweet, retail	17352
		Marmite, yeast extract	17380		Marmite	17380
		Cheese sauce, made with whole milk, recipe	x2268		Cheese sauce, made with whole milk, recipe	x2268
		White sauce, savoury, made with whole milk, recipe	x2296		White sauce, savoury, made with whole milk, recipe	x2296
					Chocolate spread, retail	SD100
					Hazelnut spread, retail	SD101
					Curry sauce, ready-to-serve, retail	SG100
					Hummus, retail	SG200
					Pesto, green	SG300
					Pesto, red	SG310
					Pasta sauce, tomato, retail	SG400
					Soy sauce, light and dark varieties, retail	SG500
					Vinegar	SG600
	Soups	Cream of chicken soup, canned, ready to serve	17250		Cream of chicken soup, canned, ready to serve	17250
		Oxtail soup, canned, ready to serve	17272		Oxtail soup, canned, ready to serve	17272
		Vegetable soup, canned, ready to serve	17284		Vegetable soup, canned, ready to serve	17284
					Tomato soup, canned, ready to serve	SO100
	Meat and meat products	Bacon, fat only, cooked, average	339		Bacon fat, cooked, average	339-1
					Ham fat, cooked, average	339-2
		Rump steak, grilled	18049		Rump steak, grilled	18049
		Beef fat only, raw, average	18005		Beef fat only, raw, average	18005
		Beef burgers, frozen, fried, retail	19029		Beef burgers, frozen, fried, retail	19029
		Pork chop, loin, lean only, grilled	18251		Pork chop, loin, lean only, grilled	18251
		Pork, fat only, raw, average	18205		Pork, fat only, raw, average	18205
		Lamb chop, loin, lean only, grilled	18141		Lamb chop, loin, lean only, grilled	18141
		Lamb, fat only, raw average	18100		Lamb, fat only, raw average	18100
		Chicken, roast, meat only	18331		Chicken, roast, meat only	18331
		Turkey, roast, meat only	18361		Turkey, roast, meat only	18361
		Bacon, lean only, grilled, average	19008		Bacon, lean only, grilled, average	19008
		Ham, canned	19024		Ham, canned, retail	19024
		Corned beef, canned	19128		Corned beef, canned	19128
		Luncheon meat, canned	19135		Luncheon meat, canned	19135
		Beef sausages, chilled, grilled	19077		Sausages, beef, grilled	19077
		Pork sausages, chilled, grilled	19080		Sausages, pork, grilled	19080
		Cornish pastie, commercial	19056		Cornish pastie, retail	19056
		Pork pie, individual	19063		Pork pie, individual, retail	19063
		Steak and kidney pie, pastry top only, fat removed	x0535		Steak and kidney pie, pastry top only, recipe	x0535
		Steak and kidney/Beef pie, individual, chilled/frozen, baked	19069		Steak and kidney pie, individual, retail	19069
		Sausage rolls, flaky pastry, homemade	19067		Sausage roll, flaky pastry, recipe	19067
		Sausage rolls, short pastry, homemade	19068		Sausage roll, short pastry, recipe	19068
		Liver, lamb, fried	18414		Liver, lamb, fried	18414
		Liver, pig, stewed	18418		Liver, pig, stewed	18418
		Liver sausage	19106		Liver sausage	19106
	Fish and fish products	Cod in batter, fried in retail blend oil	16023		Cod in batter, fried in retail blend oil	16023
		Fish fingers, frozen, fried in blended oil	16289		Fish fingers, frozen, fried in blended oil	16289
		Fish cakes, frozen, grilled	16281		Fish cakes, frozen, grilled	16281
		Cod, baked	16013		Cod, baked	16013
		Herring, grilled	16176		Herring, grilled	16176
		Kipper, grilled	16188		Kipper, grilled	16188
		Mackerel, fried in blended oil	16192		Mackerel, fried in blended oil	16192
		Salmon, grilled	16203		Salmon, grilled	16203
		Sardines, canned in vegetable and olive oil, drained	16216		Sardines, canned in vegetable and olive oil, drained	16216
		Tuna, canned in brine, drained	16229		Tuna, canned in brine, drained	16229
		Crab, boiled	16232		Crab, boiled	16232
		Prawns, boiled	16239		Prawns, boiled	16239
		Mussels, boiled	16256		Mussels, boiled	16256
		Taramasalata	16307		Taramasalata	16307

## Sheet: Supplemental Table 2
	Supplemental Table 2. Agreements between KCL (Poly)phenol FFQs estimated nutrients intake and 7DDs adjusted by energy intake (EI)
	Nutrients	Kappa	(95% CI)	Same quartile (%)	Adjacent quartile (%)	Correctly classified into the same or adjacent quartiles (%)	Opposite quartile (%)
	Fibre (g/d)	0.28	(0.05, 0.51)	26.67	51.67	78.33	8.33
	Calcium (mg/d)	0.11	(-0.15, 0.36)	26.67	40	66.67	10
	Iron (mg/d)	0.21	(-0.01, 0.44)	23.33	45	68.33	5
	Potassium (mg/d)	0.07	(-0.18, 0.31)	26.67	36.67	63.33	10
	Retinol (μg/d)	-0.08	(-0.33, 0.17)	16.67	43.33	60	13.33
	Carotene (μg/d)	0.09	(-0.15, 0.33)	23.33	43.33	66.67	10
	Vitamin C (mg/d)	0	(-0.25, 0.25)	21.67	43.33	65	13.33
	Fat (g/d)	0.31	(0.08, 0.53)	31.67	41.67	73.33	5
	Cholesterol (mg/d)	0.24	(-0.01, 0.49)	36.67	35	71.67	8.33
	MUFA (g/d)	0.29	(0.07, 0.51)	35	33.33	68.33	3.33
	PUFA (g/d)	0.24	(0.01, 0.47)	28.33	43.33	71.67	6.67
	SFA (g/d)	-0.01	(-0.28, 0.26)	21.67	45	66.67	15
	Protein (g/d)	0.37	(0.16, 0.58)	28.33	51.67	80	5
	Total carbohydrate (g/d)	0.36	(0.14, 0.58)	41.67	30	71.67	3.33
	Sugars (g/d)	0.31	(0.07, 0.55)	33.33	45	78.33	8.33
	Fructose (g/d)	0.15	(-0.12, 0.41)	36.67	30	66.67	10
	Galactose (g/d)	-0.08	(-0.31, 0.15)	13.33	45	58.33	11.67
	Glucose (g/d)	0.17	(-0.09, 0.43)	38.33	30	68.33	10
	Starch (g/d)	0.37	(0.15, 0.59)	33.33	45	78.33	5
	Sucrose (g/d)	0.16	(-0.09, 0.41)	31.67	35	66.67	8.33
	Lactose (g/d)	-0.01	(-0.28, 0.26)	30	36.67	66.67	16.67
	Maltose (g/d)	-0.03	(-0.26, 0.21)	20	35	55	8.33

## Sheet: Supplemental Table 3
	Supplemental Table 3. (Poly)phenol intake classes and subclasses estimated from EPIC-Norfolk FFQs and their food source (mg/d)
	(Poly)phenols (mg/d)	Mean (SD)	Median (IQR)	%	EPIC-Norfolk FFQs estimated (poly)phenol food sources (% to total)
	Total (poly)phenols	962.1 (741.3)	741.2 (844.2)	100	Coffee (41.0%), Tea (23.6%), Apple (5.4%), White rice (2.8%), Tomatoes (1.9%), Orange (1.8%), Drinking chocolate powder (1.7%), Spinach (1.5%)
	Total Flavonoids	429.5 (385.1)	330.5 (305.3)	44.6	Tea (47.8%), Apple (10.4%), Orange (4.2%), Tomatoes (3.8%), Drinking chocolate powder (3.7%), Spinach (3.1%), Grape (2.9%), Apple juice (2.0 %), Orange juice (1.9%)
	Anthocyanins	7 (6.1)	5.4 (6.1)	0.7	Strawberry (20.7%), Mousse (17.6%), raspberry (16.6%), Fruit drink/squash (13.3%), Jam (8.6%), Whole milk yogurt, fruit (7.3%), Plums (4.4%), Orange juice (4.1%), Apple (3.2%), Ice cream (1.7%)
	Chalcones	0 (0)	0 (0)	0	Broad beans (91.5%), Lager (8.5%)
	Dihydroflavonols	0 (0)	0 (0)	0	Rose wine (100%)
	Dihydrochalcones	2.1 (2.5)	1.3 (1.9)	0.2	Apple (71.7%), Apple juice (26.5%), Chutney apple (1.7%)
	Total flavan-3-ols	328.9 (342.7)	224.4 (263.6)	34.2	Tea (61.3%), Apple (12.8%), Drinking chocolate powder (4.8%), Grape (3.7%), Hazelnuts (3.3%), Apple juice (2.3%), Broad beans (1.6%), Strawberries (1.4%), Mousse (1.2%), Mars bar (1.1%), Twix (1.1%)
	Flavan-3-ol monomers	78.3 (99.1)	47 (81.7)	8.1	Tea (82.4%), Apple (4.7%), Broad beans (3.6%), Apple juice (2.0%), Drinking chocolate powder (1.6%), Bananas (0.8%), Pears (0.5%)
	Theaflavins	16.3 (24)	10.2 (22)	1.7	Tea (100%)
	Thearubigins	106.2 (156.6)	66.4 (143.7)	11	Tea (100%)
	Proanthocyanidins	128.1 (101.6)	99.5 (103.1)	13.3	Apple (29.9%), Tea (11.6%), Drinking chocolate powder (11.3%), Grapes (9.3%), Hazelnuts (8.3%), Apple juice (4.7%), Strawberries (3.5%). Mousse (3.0%), Mars bar (2.6%), Twix (2.6%), Plums (2.2%), Broad beans (2.0%)
	Flavanones	30.6 (37.5)	23.1 (35.1)	3.2	Orange (58.5%), Orange juice (23.7%), Grapefruit (15.2%), Tomatoes (1.0%), Trifle (0.4%)
	Flavones	4.2 (3.2)	3.5 (3.1)	0.4	Brown bread (18.4%), Orange juice (12.2%), Celery (9.1%), Digestive biscuits, chocolate (7.5%), Pizza (frozen & homemade) (13.2%), Spinach (4.4%), Croissants (3.4%)
	Flavonols	47.1 (35.4)	39.8 (37.2)	4.9	Tomatoes (34.0%), Spinach (27.9%), Onions (8.1%), Vegetable soup (7.9%), Tea (7.7%), Broccoli (3.0%), Apple (2.0%)
	Isoflavonoids	9.7 (16.7)	3.5 (12.8)	1	Tofu (46.0%), Soya milk (34.1%), Beansprouts (15.5%), Vegeburger (2.6%), Soya mince (1.3%)
	Total Phenolic acids	515.7 (509.2)	365.4 (502.4)	53.6	Coffee (75.2%), White & brown rice (7.8%), Tea (4.7%), Potatoes (1.5%), Apple (1.4%), Carrot (1.1%), Raspberry (0.9%), Garlic (0.9%)
	Hydroxybenzoic acids	40.9 (34.7)	31.6 (29.8)	4.3	Tea (51.6%), Raspberry (11.3%), Garlic (10.0%), White rice (5.5%), Strawberry (3.5%), Mousse (3.0%), Carrots (2.8%), Cauliflower (2.1%), Mushrooms (1.3%), Whole milk yogurt, fruit (1.2%), Bananas (1.0%), Lager (1.0%)
	Ellagitannins	3.5 (4.5)	1.5 (3.8)	0.4	Raspberry (98.7%), Ice cream, non-dairy, vanilla (1.3%)
	Hydroxycinnamic acids	474.7 (499.2)	308.9 (492.3)	49.3	Coffee (81.5%), White & brown rice (7.9%), Potatoes (1.6%), Apple (1.5%), Tea (0.7%), Broccoli (0.5%), Carrots (1.0%)
	Hydroxyphenylacetic acids	0 (0)	0 (0)	0	Lager (98.6%), Olive oil (1.3%)
	Total Stilbenes	0.1 (0.1)	0.1 (0.1)	0	Rose wine (33.6%), Grapes (30.5%), Strawberries (14.3%), Mousse (12.2%), Whole milk yogurt, fruit (5.0%), Peanut butter (2.2%), Fruitcake (1.6%)
	Resveratrol	0.1 (0.1)	0.1 (0.1)	0	Grapes (31.7%), Rose wine (31.0%), Strawberries (14.9%), Mousse (12.7%), Whole milk yogurt, fruit (5.2%), Peanut butter (2.3%), Fruitcake (1.7%)
	Total Lignans	1.8 (1.9)	1.4 (1.3)	0.2	Potatoes (44.5%), Chips (10.4%), Broccoli (10.3%), Vegetable soup (3.6%), Tea (3.0%), Orange (2.6%), Cabbage (2.3%)
	Other (poly)phenols	15.1 (17)	9.9 (12.5)	1.6	Spaghetti (whole meal & white 33.5%), Coffee (21.4%), Wholemeal bread (15.1%), Brown bread (7.4%), Shredded wheat (4.4%), Digestive biscuits, chocolate (3.6%)
	Tyrosols	0.4 (0.7)	0.1 (0.6)	0	Olive oil (54.8%), Rose wine (25.2%), Lager (12.4%), Sherry (5.1%), Trifle (1.5%), Fat spread (1.0%)
	Alkylmethoxyphenols	1.6 (1.8)	0.9 (1.8)	0.2	Coffee (86.2%), Fat spread (11.5%), Lager (1.6%), Rapeseed oil (0.6%)
	Alkylphenols	11.2 (15.8)	6.4 (8.9)	1.2	Spaghetti (whole meal & white 45.1%), Wholemeal bread (20.4%), Brown bread (9.9%), Shredded wheat (5.9%), Digestive biscuits, chocolate (4.8%), Bran flakes (4.1%), Coffee (2.9%), Muesli (2.1%)
	EPIC-Norfolk FFQ: European Prospective Investigation into Cancer and Nutrition food frequency questionnaire

## Sheet: Supplemental Table 4
		Supplemental Table 4. Agreements between energy adjusted (poly)phenol intakes estimated from EPIC-Norfolk FFQs and KCL (Poly)phenol FFQs
		(Poly)phenols (mg/d)	ICC-A	(95% CI)	ICC-C	(95% CI)	Kappa	(95% CI)	Same quartile (%)	Adjacent quartile (%)	Correctly classified into the same or adjacent quartiles (%)	Opposite quartile (%)	Spearman's Rho	(95% CI)
		Total (poly)phenols	0.6	(0.48, 0.70)	0.6	(0.48, 0.70)	0.49	(0.39, 0.60)	38.86	45.02	83.89	3.32	0.51 a	(0.41, 0.61)
		Total Flavonoids	0.53	(0.39, 0.65)	0.53	(0.39, 0.64)	0.36	(0.24, 0.49)	35.07	44.08	79.15	6.16	0.42 a	(0.30, 0.52)
		Anthocyanins	0.57	(0.44, 0.67)	0.57	(0.43, 0.67)	0.51	(0.41, 0.62)	44.08	38.86	82.94	2.84	0.54 a	(0.44, 0.63)
		Chalcones	0.64	(0.53, 0.72)	0.64	(0.52, 0.72)	0.53	(0.43, 0.63)	43.6	40.76	84.36	2.84	0.57 a	(0.47, 0.66)
		Dihydroflavonols	0.66	(0.56, 0.74)	0.66	(0.56, 0.74)	0.53	(0.43, 0.63)	45.97	37.91	83.89	2.84	0.61 a	(0.52, 0.69)
		Dihydrochalcones	0.66	(0.55, 0.74)	0.66	(0.55, 0.74)	0.53	(0.43, 0.63)	40.28	45.5	85.78	2.84	0.60 a	(0.50, 0.68)
		Total flavan-3-ols	0.58	(0.45, 0.68)	0.58	(0.45, 0.68)	0.43	(0.31, 0.54)	37.91	42.18	80.09	4.27	0.47 a	(0.35, 0.56)
		Flavan-3-ol monomers	0.64	(0.53, 0.72)	0.64	(0.52, 0.72)	0.54	(0.44, 0.64)	41.23	44.08	85.31	2.37	0.57 a	(0.48, 0.66)
		Theaflavins	0.64	(0.53, 0.73)	0.64	(0.53, 0.73)	0.54	(0.45, 0.64)	39.34	46.92	86.26	2.37	0.59 a	(0.49, 0.67)
		Thearubigins	0.64	(0.53, 0.73)	0.64	(0.53, 0.73)	0.54	(0.45, 0.64)	39.34	46.92	86.26	2.37	0.59 a	(0.49, 0.67)
		Proanthocyanidins	0.53	(0.39, 0.64)	0.53	(0.39, 0.64)	0.39	(0.27, 0.51)	37.44	41.23	78.67	5.21	0.40 a	(0.28, 0.50)
		Flavanones	0.59	(0.46, 0.69)	0.59	(0.46, 0.69)	0.51	(0.41, 0.62)	41.71	41.23	82.94	2.37	0.55 a	(0.45, 0.64)
		Flavones	0.51	(0.36, 0.63)	0.51	(0.35, 0.62)	0.44	(0.33, 0.56)	40.76	40.76	81.52	4.74	0.44 a	(0.32, 0.54)
		Flavonols	0.54	(0.39, 0.65)	0.53	(0.39, 0.65)	0.37	(0.24, 0.49)	39.34	37.91	77.25	5.69	0.42 a	(0.30, 0.53)
		Isoflavonoids	0.64	(0.53, 0.72)	0.64	(0.52, 0.72)	0.53	(0.43, 0.63)	42.18	42.18	84.36	2.37	0.60 a	(0.50, 0.68)
		Total Phenolic acids	0.67	(0.56, 0.75)	0.67	(0.56, 0.75)	0.51	(0.41, 0.60)	38.86	43.6	82.46	1.9	0.58 a	(0.48, 0.66)
		Hydroxybenzoic acids	0.63	(0.52, 0.72)	0.63	(0.52, 0.72)	0.47	(0.35, 0.58)	39.34	44.55	83.89	4.74	0.52 a	(0.42, 0.61)
		Ellagitannins	0.66	(0.55, 0.74)	0.66	(0.55, 0.74)	0.52	(0.42, 0.62)	44.55	38.86	83.41	2.84	0.58 a	(0.48, 0.66)
		Hydroxycinnamic acids	0.67	(0.57, 0.75)	0.67	(0.56, 0.75)	0.54	(0.45, 0.63)	41.23	41.71	82.94	0.95	0.59 a	(0.49, 0.67)
		Hydroxyphenylacetic acids	0.67	(0.56, 0.75)	0.67	(0.56, 0.75)	0.57	(0.47, 0.67)	48.82	36.49	85.31	2.37	0.62 a	(0.53, 0.70)
		Total Stilbenes	0.64	(0.53, 0.73)	0.64	(0.53, 0.73)	0.53	(0.42, 0.63)	45.02	38.86	83.89	2.84	0.57 a	(0.47, 0.65)
		Resveratrol	0.65	(0.54, 0.73)	0.65	(0.54, 0.73)	0.53	(0.42, 0.63)	45.97	38.39	84.36	3.32	0.56 a	(0.46, 0.65)
		Total Lignans	0.59	(0.46, 0.68)	0.58	(0.46, 0.68)	0.51	(0.41, 0.62)	45.02	38.39	83.41	3.32	0.56 a	(0.45, 0.64)
		Other (poly)phenols	0.59	(0.46, 0.69)	0.59	(0.46, 0.69)	0.49	(0.38, 0.60)	44.08	39.34	83.41	4.27	0.52 a	(0.41, 0.61)
		Tyrosols	0.68	(0.58, 0.75)	0.68	(0.58, 0.75)	0.53	(0.43, 0.63)	41.23	43.13	84.36	2.37	0.57 a	(0.48, 0.66)
		Alkylmethoxyphenols	0.67	(0.57, 0.75)	0.67	(0.57, 0.75)	0.58	(0.49, 0.66)	37.91	49.29	87.2	0.95	0.60 a	(0.50, 0.68)
		Alkylphenols	0.69	(0.59, 0.76)	0.69	(0.59, 0.76)	0.51	(0.40, 0.61)	41.71	42.18	83.89	3.32	0.53 a	(0.42, 0.62)
		ICC-C: intraclass correlation coefficient-consistency model: when the systematic difference between EPIC-Norfolk FFQ and KCL (Poly)phenol FFQ estimated (poly)phenol intakes were not relevant. ICC-A: intraclass correlation coefficient-agreement model: when the systematic difference between EPIC-Norfolk FFQ and KCL (Poly)phenol FFQ estimated (poly)phenol intakes were relevant. EPIC: European Prospe…

## Sheet: Supplemental Table 5
	Supplemental Table 5. Agreements between EPIC-Norfolk FFQs estimated (poly)phenol intakes and 7DDs
	(Poly)phenols	Kappa	(95% CI)	Same quartile (%)	Adjacent quartile (%)	Correctly classified into the same or adjacent quartiles (%)	Opposite quartile (%)
	Total (poly)phenols	0.15	(-0.11, 0.41)	30	41.67	71.67	11.67
	Total Flavonoids	-0.13	(-0.36, 0.10)	16.67	41.67	58.34	15
	Anthocyanins	-0.16	(-0.40, 0.08)	20	35	55	15
	Chalcones	0.2	(-0.05, 0.45)	30	43.33	73.33	10
	Dihydroflavonols	0.47	(0.26, 0.67)	38.33	43.33	81.66	3.33
	Dihydrochalcones	0.41	(0.22, 0.61)	31.67	45	76.67	1.67
	Total flavan-3-ols	-0.16	(-0.41, 0.09)	23.33	33.33	56.66	16.67
	Flavan-3-ol monomers	0.09	(-0.16, 0.35)	36.67	28.33	65	11.67
	Theaflavins	0.16	(-0.10, 0.42)	35	33.33	68.33	10
	Thearubigins	0.16	(-0.10, 0.42)	38.33	31.67	70	11.67
	Proanthocyanidins	0.03	(-0.23, 0.29)	28.33	36.67	65	13.33
	Flavanones	-0.11	(-0.36, 0.15)	25	30	55	13.33
	Flavones	-0.16	(-0.41, 0.09)	20	43.33	63.33	20
	Flavonols	0.21	(-0.03, 0.46)	30	41.67	71.67	8.33
	Isoflavonoids	0.12	(-0.14, 0.38)	25	43.33	68.33	10
	Total Phenolic acids	0.45	(0.23, 0.68)	41.67	43.33	85	6.67
	Hydroxybenzoic acids	0.09	(-0.16, 0.35)	31.67	35	66.67	11.67
	Ellagitannins	0.16	(-0.11, 0.43)	41.67	30	71.67	13.33
	Hydroxycinnamic acids	0.45	(0.22, 0.68)	46.67	36.67	83.34	6.67
	Hydroxyphenylacetic acids	0.24	(-0.01, 0.49)	31.67	41.67	73.34	8.33
	Total Stilbenes	0.17	(-0.10, 0.44)	33.33	45	78.33	15
	Resveratrol	0.12	(-0.14, 0.38)	30	45	75	15
	Total Lignans	0	(-0.22, 0.22)	13.33	51.67	65	11.67
	Other (poly)phenols	-0.11	(-0.37, 0.15)	26.67	33.33	60	16.67
	Tyrosols	0.11	(-0.17, 0.38)	28.33	43.33	71.66	13.33
	Alkylmethoxyphenols	0.48	(0.28, 0.68)	35	51.67	86.67	5
	Alkylphenols	-0.05	(-0.31, 0.20)	23.33	36.67	60	13.33
	EPIC: European Prospective Investigation into Cancer and Nutrition, FFQs: food frequency questionnaires, 7DDs: 7-day diet diaries, Kappa: weighted kappa coefficient (linear weights). CI: confidence interval.

## Sheet: Supplemental Table 6
	Supplemental Table 6. Agreements between EPIC-Norfolk FFQs estimated (poly)phenol intake and biomarkers
	Metabolite levels	Groups	Kappa	(95% CI)	Same quartile (%)	Adjacent quartile (%)	Correctly classified into the same or adjacent quartiles (%)	Opposite quartile (%)
	Urine sample	Total (poly)phenols	0.04	(-0.26, 0.34)	24.39	43.9	68.29	14.63
		Total flavonoids	-0.02	(-0.31, 0.28)	26.83	31.71	58.54	12.2
		Total dihydrochalcones	0.04	(-0.27, 0.36)	31.71	34.15	65.85	14.63
		Total flavan-3-ols	-0.15	(-0.44, 0.14)	19.51	34.15	53.66	14.63
		Total flavanones	-0.32	(-0.59, -0.06)	14.63	34.15	48.78	19.51
		Total flavonols	-0.02	(-0.32, 0.29)	24.39	39.02	63.41	14.63
		Total isoflavonoids	-0.11	(-0.39, 0.17)	24.39	26.83	51.22	12.2
		Total phenolic acids	0.14	(-0.16, 0.43)	24.39	43.9	68.29	9.76
		Total hydroxybenzoic acids	0.02	(-0.28, 0.32)	19.51	48.78	68.29	14.63
		Total cinammic acids	0.02	(-0.31, 0.35)	24.39	46.34	70.73	17.07
		Total phenylacetic acids	-0.02	(-0.33, 0.30)	24.39	39.02	63.41	14.63
		Total stilbenes	-0.015	(-0.32, 0.29)	19.51	41.46	60.98	12.2
		Total lignans	0.042	(-0.23, 0.32)	14.63	48.78	63.41	9.76
		Total other (poly)phenol	-0.11	(-0.40, 0.18)	17.07	36.59	53.66	12.2
		Total tyrosols	-0.26	(-0.53, 0.00)	9.76	41.46	51.22	17.07
	Plasma sample	Total (poly)phenols	0.04	(-0.28, 0.37)	33.33	27.78	61.11	11.11
		Total flavonoids	-0.04	(-0.36, 0.27)	19.44	38.89	58.33	11.11
		Total dihydrochalcones	-0.04	(-0.36, 0.27)	25	36.11	61.11	13.89
		Total flavan-3-ols	0.13	(-0.18, 0.44)	25	41.67	66.67	8.33
		Total flavanones	-0.36	(-0.65, -0.06)	19.44	22.22	41.67	16.67
		Total flavonols	0.09	(-0.21, 0.39)	22.22	41.67	63.89	8.33
		Total isoflavonoids	-0.04	(-0.35, 0.26)	22.22	30.56	52.78	8.33
		Total phenolic acids	0.02	(-0.30, 0.35)	27.78	33.33	61.11	11.11
		Total hydroxybenzoic acids	0.09	(-0.22, 0.40)	19.44	50	69.44	11.11
		Total cinammic acids	-0.04	(-0.38, 0.29)	30.56	33.33	63.89	16.67
		Total phenylacetic acids	-0.16	(-0.49, 0.18)	27.78	27.78	55.56	16.67
		Total stilbenes	0.4	(0.15, 0.65)	22.22	58.33	80.56	2.78
		Total lignans	-0.11	(-0.38, 0.16)	5.56	47.22	52.78	8.33
		Total other (poly)phenol	-0.11	(-0.42, 0.20)	16.67	41.67	58.33	13.89
		Total tyrosols	-0.2	(-0.52, 0.12)	22.22	36.11	58.33	19.44
	EPIC: European Prospective Investigation into Cancer and Nutrition, FFQ: food frequency questionnaire, Kappa: weighted kappa coefficient (linear weights). CI: confidence interval.
