# Supplementary material for: Development of a food frequency questionnaire for the estimation of dietary (poly)phenol intake
Source: Royal Society of Chemistry journal article supplement (doi:10.1039/d4fo03546a), 2024-01-01
Supplement: d4fo03546a2.pdf [file d4fo03546a2.pdf]

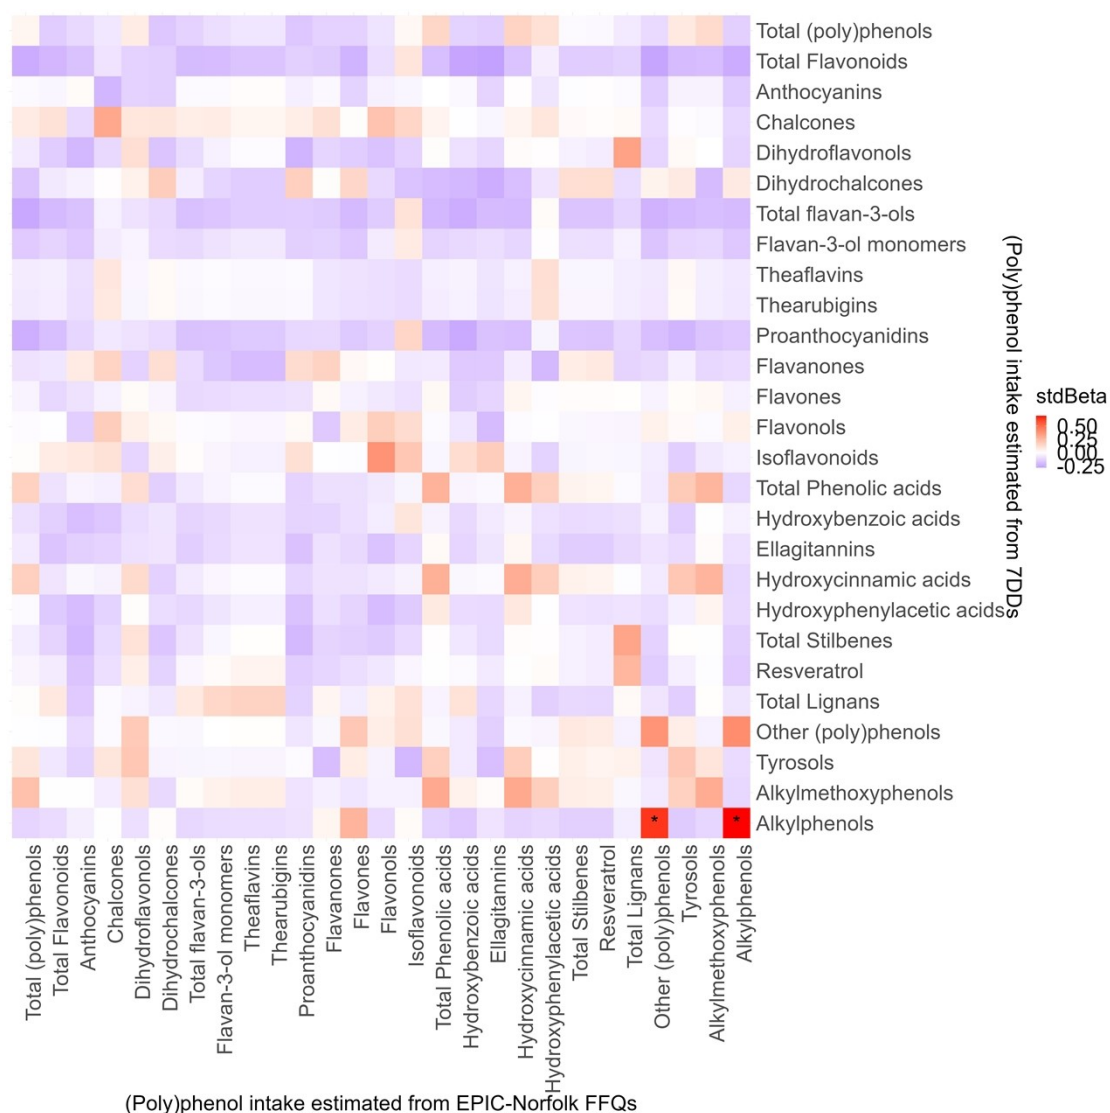

**Supplementary figure 1. Association between estimated (poly)phenol intakes from 7DDs and intakes from EPIC-Norfolk FFQs adjusted for energy intake.** 7DDs: 7-day diet diaries. EPIC: European Prospective Investigation into Diet and Cancer, FFQs: food frequency questionnaires; The heatmap was plotted according to the standardised regression coefficients (stdBeta). The colour scale indicates the effect (stdBeta) of association between 7DDs and EPIC-Norfolk FFQs estimated (poly)phenol intake level. Red and blue illustrate positive and negative effects, and colour intensity represents the degree of effect. The asterisks showed significance (\*: fdr-adjusted  $p < 0.05$ ).

## EPIC-Norfolk FFQs vs Urine

**a**

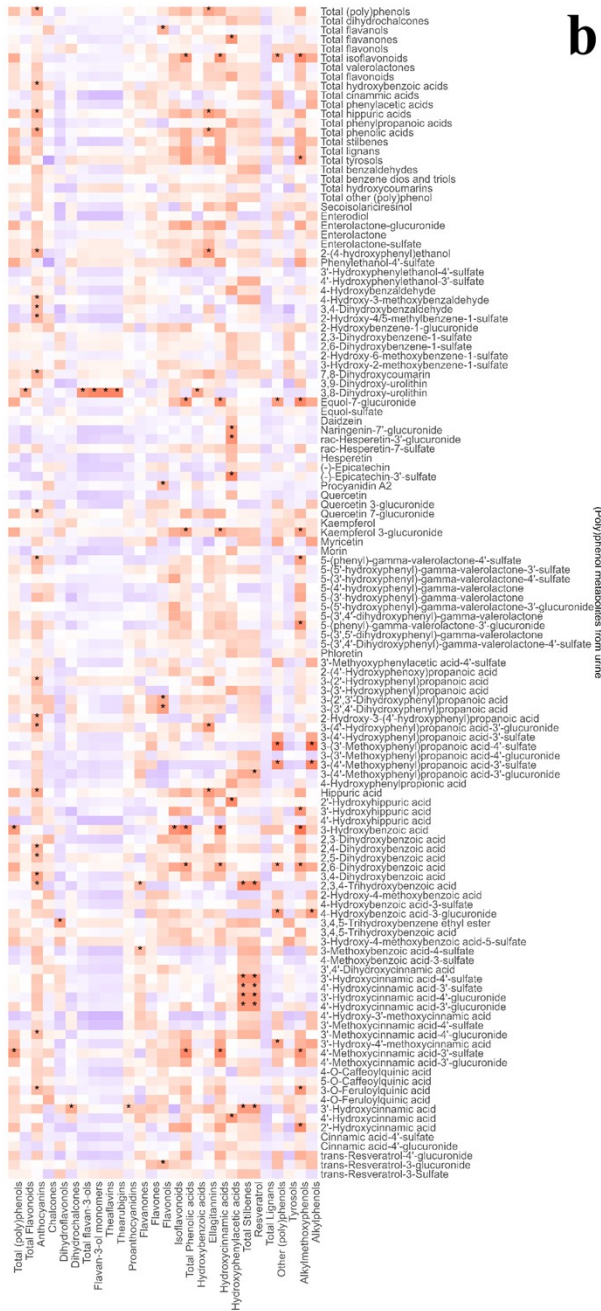

## EPIC-Norfolk FFQs vs Plasma

**b**

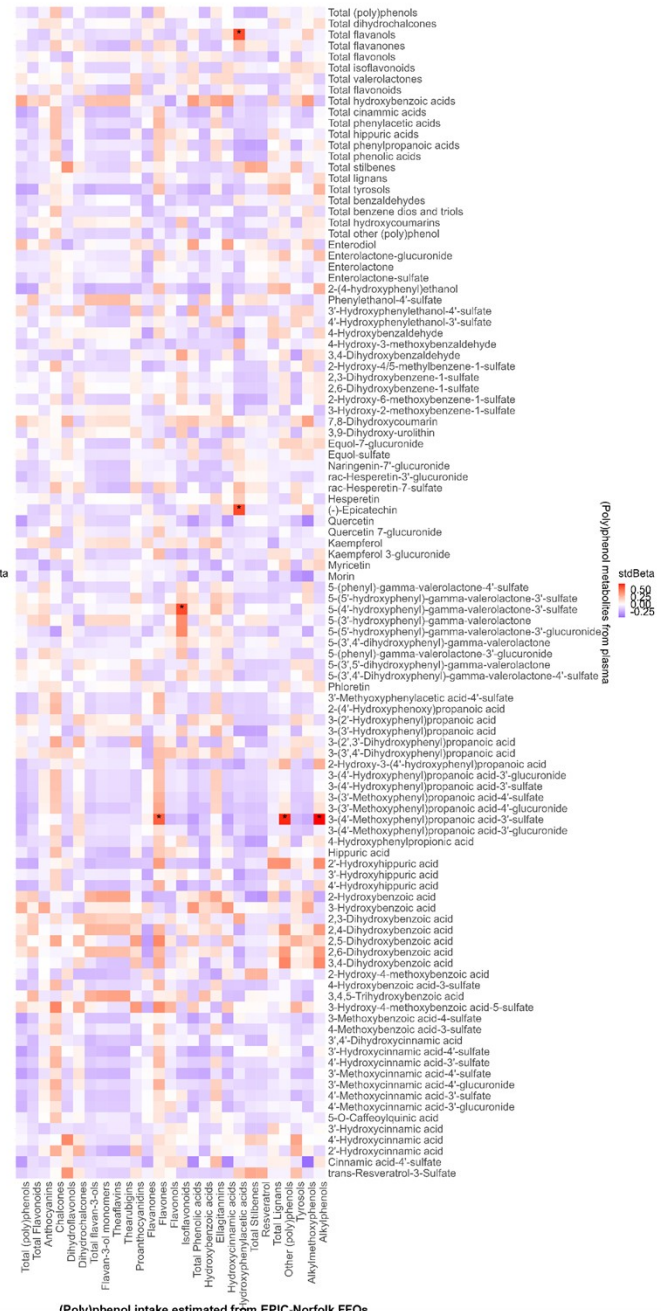

(Poly)phenol intake estimated from EPIC-Norfolk FFQs

(Poly)phenol intake estimated from EPIC-Norfolk FFQs

**Supplementary figure 2. Association between (poly)phenol intakes from EPIC-Norfolk FFQs and (poly)phenol metabolites from spot urine (a) and plasma sample (b) adjusted for energy intake.** EPIC: European Prospective Investigation into Diet and Cancer, FFQs: Food frequency questionnaires. The heatmap was plotted according to the standardised regression coefficients (stdBeta). The colour scale indicates the effect (stdBeta) of association between (poly)phenol metabolites and EPIC-Norfolk FFQs estimated (poly)phenol intake level. Red and blue illustrate positive and negative effects, and colour intensity represents the degree of effect. The asterisks showed significance (\*: fdr-adjusted  $p < 0.05$ ).
